# Supplementary material for: Tuning the crystal structures of metal-tetraphenylporphines via a magnetic field
Source: Royal Society of Chemistry journal article supplement (doi:10.1039/c8nj01882k), 2018-01-01
Supplement: c8nj01882k1.pdf [file c8nj01882k1.pdf]

## Supporting information

**Table S1.** Relative contributions of the various intermolecular interactions to the total Hirshfeld surface of crystals **1-3**, respectively.

|                | <b>1</b> | <b>2</b> | <b>3</b> |
|----------------|----------|----------|----------|
| Cu...H/H... Cu | 1.4      | 2.4      | 2.4      |
| N...C/ C...N   | 1.3      | 0.1      | 0.1      |
| N...H/H...N    | 7.1      | 8.0      | 8.0      |
| C...C          | 14.3     | 7.3      | 7.3      |
| C...H/H...C    | 26.5     | 27.1     | 26.8     |
| H...H          | 48.4     | 55       | 55.4     |

**Table S2.** Selected bond angles of crystals **1, 2, 3**

| angles     | <b>1</b> | angles     | <b>2</b> | angles    | <b>3</b> |
|------------|----------|------------|----------|-----------|----------|
| N1-Cu1-N1  | 177.4    | N1-Cu1-N1  | 177.4    | N1-Cu1-N1 | 177.2    |
| Cu1-N1-C1  | 125.64   | Cu1-N1-C1  | 126.6    | Cu1-N1-C4 | 126.9    |
| C4-N1-C1   | 107.88   | C4-N1-C1   | 106.4    | C4-N1-C1  | 106.1    |
| C6-C5-C4   | 108.60   | C4-C3-C2   | 107.0    | C3-C2-C1  | 106.9    |
| C10-C8-C2  | 118.90   | C7-C6-C11  | 119.2    | C7-C6-C11 | 121.6    |
| C2-C8-C7   | 121.22   | C7-C6-C5   | 121.2    | C11-C6-C5 | 119.5    |
| C9-C11-C10 | 118.63   | C9-C11-C10 | 120.2    | C9-C8-C7  | 119.5    |
| N1-C1-C7   | 127.34   | N1-C1-C5   | 126.0    | N1-C4-C5  | 125.2    |
| C4-C1-C7   | 124.81   | C2-C1-C5   | 123.8    | C3-C4-C5  | 124.8    |
| C5-C6-C7   | 125.81   | C3-C4-C5   | 124.8    | C2-C1-C5  | 123.3    |

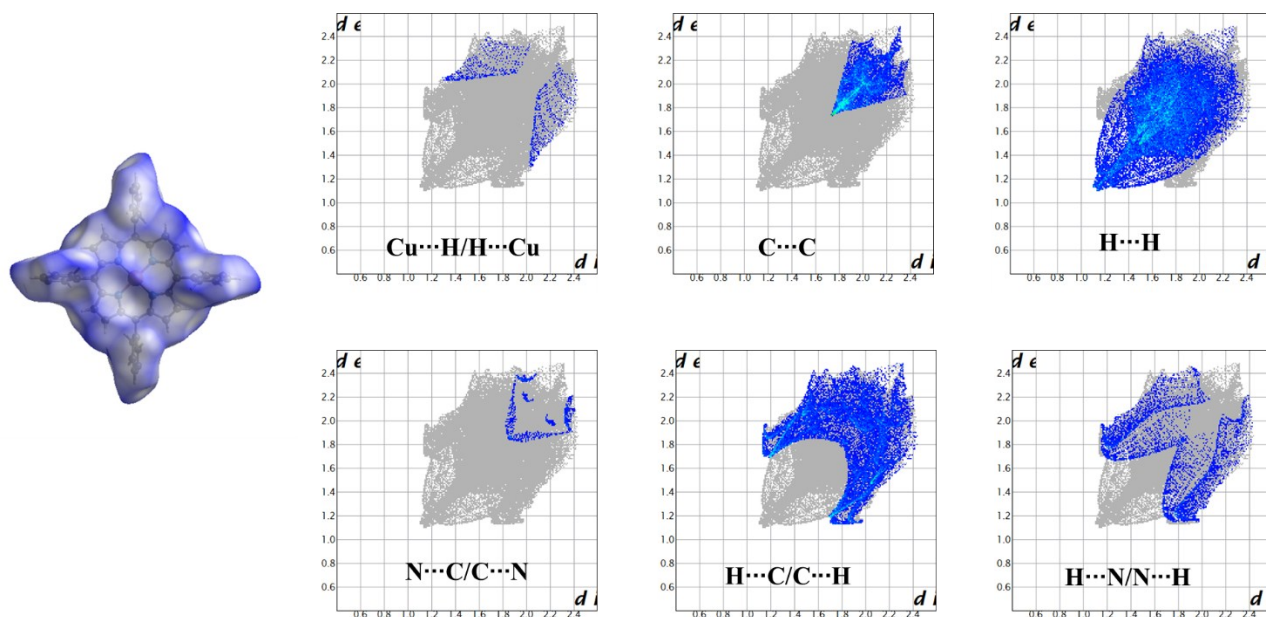

**Figure S1.** 3D  $d_{\text{norm}}$  Hirshfeld surface (left) and 2D fingerprint plots (right) of crystal **1**.

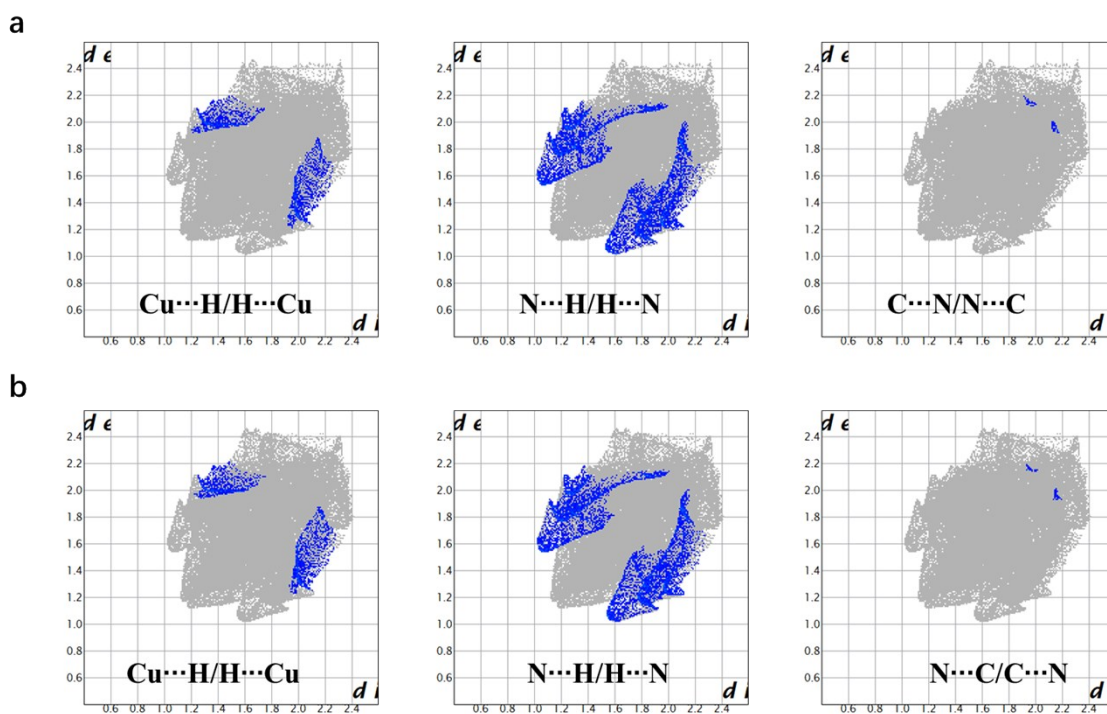

**Figure S2.** 2D fingerprint plots (right) resolved into Cu–H, N...H/H...N and C...N/N...C interaction for crystals **2** (upper **a**) and **3** (lower **b**), respectively; the full fingerprint appears beneath each decomposed plot as a grey shadow.
